# Supplementary material
Source: publisher figshare collection journal article supplement (https://acs.figshare.com/ndownloader/files/3598710)
Supplement: Supplementary file 1 [file 3598710]

# **Structural Characterization of the UV-Induced Fragmentation Products in an Ion Trap by Infra-Red Multiple Photon Dissociation Spectroscopy.**

*Debora Scuderi,<sup>\*a</sup> Valeria Lepere,<sup>b</sup> Giovanni Piani,<sup>b</sup> Aude Bouchet<sup>b</sup> and Anne Zehnacker-Rentien<sup>\*b</sup>*

a) Univ. Paris-Sud, Laboratoire de Chimie Physique, CNRS, F-91405 Orsay, France. Fax: +33169156188; Tel: +33169157574; e-mail: [debora.scuderi@u-psud.fr](mailto:debora.scuderi@u-psud.fr)

b) Univ. Paris-Sud, Institut des Sciences Moléculaires d'Orsay, CNRS, F-91405 Orsay, France. Fax: +33169156777; Tel: +33169153933; e-mail: [anne.zehnacker-rentien@u-psud.fr](mailto:anne.zehnacker-rentien@u-psud.fr)

## **Supplementary Information**

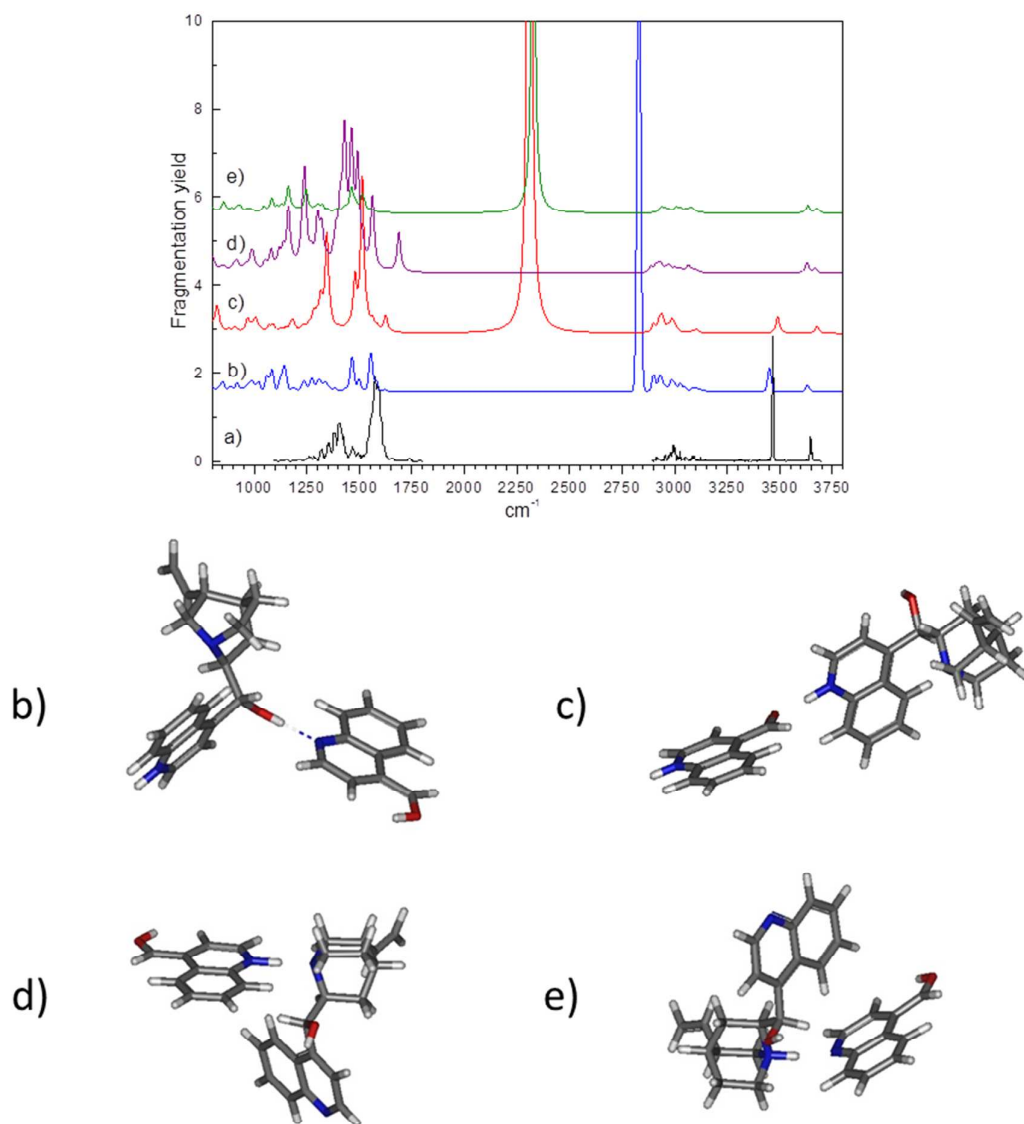

Figure S1.

Comparison between the experimental (a) and simulated (b-e) vibrational spectrum (top) and calculated structure (bottom) of the photofragment ( $m/z$  453) arising from the UVPD of  $(\text{Cd})_2\text{H}^+$ . The experimental IRMPD spectrum has been recorded by monitoring the  $\text{CdH}^+$  loss channel. The structures have been calculated at the b97-D/TZVPP level of theory. The structures b) and c) match the experimental spectrum and are discussed in the text.
